# Supplementary material for: Exploiting the Role of Hypoxia-Inducible Factor 1 and Pseudohypoxia in the Myelodysplastic Syndrome Pathophysiology
Source: MDPI journal article supplement (doi:10.3390/ijms22084099), 2021-04-15
Supplement: s1 [file s1]

| Patient ID | Age (years) | Gender | MDS subtype      | IPSS-R             | Hb (g/dl) | WBC (K/ $\mu$ l) | Neutrophils (K/ $\mu$ l) | Platelets (K/ $\mu$ l) | BM Cytogenetics                                                         | Peripheral Blood Blasts (% of nucleated cells) <sup>†</sup> | BM Blasts (% of nucleated cells) <sup>††</sup> | BM cellularity* | Transfusion Dependence |
|------------|-------------|--------|------------------|--------------------|-----------|------------------|--------------------------|------------------------|-------------------------------------------------------------------------|-------------------------------------------------------------|------------------------------------------------|-----------------|------------------------|
| 1          | 81          | Female | MLD              | 1 (very low)       | 11,3      | 4,74             | 2,70                     | 139                    | 46,XX[20]                                                               | 0                                                           | 2                                              | Normocellular   | No                     |
| 2          | 83          | Male   | MLD              | 1 (very low)       | 13,0      | 3,53             | 1,90                     | 142                    | 46,XY[20]                                                               | 0                                                           | 2                                              | Hypocellular    | No                     |
| 3          | 78          | Male   | MLD              | 2,5 (low)          | 6,6       | 3,25             | 1,25                     | 116                    | 46,XY[20]                                                               | 0                                                           | 3                                              | Hypocellular    | Yes                    |
| 4          | 74          | Female | Isolated del(5q) | 2 (low)            | 8,5       | 2,77             | 1,67                     | 386                    | 46,XX,del(5q)[20]                                                       | 0                                                           | 1                                              | Normocellular   |                        |
| 5          | 82          | Female | MLD              | 1 (very low)       | 10,6      | 4,50             | 3,15                     | 177                    | 46,XX[20]                                                               | 0                                                           | 2                                              | Normocellular   | No                     |
| 6          | 77          | Male   | MLD              | 1 (very low)       | 9,3       | 4,90             | 2,74                     | 324                    | 46,X,-Y[20]                                                             | 2                                                           | 3                                              | Normocellular   | Yes                    |
| 7          | 80          | Male   | SLD              | 3 (low)            | 8,8       | 8,18             | 5,64                     | 520                    | 46,XY[20]                                                               | 0                                                           | 0                                              | Hypercellular   | Yes                    |
| 8          | 78          | Male   | MLD              | 3 (low)            | 9,5       | 2,38             | 1,67                     | 148                    | 46,XY[20]                                                               | 0                                                           | 4                                              | Normocellular   | Yes                    |
| 9          | 77          | Male   | EB 1             | 6 (high)           | 9,4       | 1,83             | 0,60                     | 56                     | 46,XY, del(5)(q11.2q33), del(20)(q11.2-13.1)[18]/46,XY[1]               | 1                                                           | 8                                              | Normocellular   |                        |
| 10         | 85          | Male   | MLD              | 3,5 (intermediate) | 5,6       | 3,48             | 2,50                     | 131                    | 47,XY,+8[20]/46,XY[5]                                                   | 0                                                           | 0                                              | Normocellular   | Yes                    |
| 11         | 63          | Male   | MLD              | 2 (low)            | 10,7      | 3,16             | 0,90                     | 274                    | 46,XY, inv(9)(p12q13)[12]                                               | 0                                                           | 0                                              | Hypocellular    | No                     |
| 12         | 79          | Female | EB 2             | 6 (high)           | 9,0       | 4,47             | 2,00                     | 103                    | 47,XX,+8[20]                                                            | 5                                                           | 15                                             | Hypercellular   | No                     |
| 13         | 90          | Male   | EB 1             | 7,5 (very high)    | 4,7       | 9,32             | 6,90                     | 184                    | 46,XY, del(7)(q21)[6]/45,XY?add(1)(p36),add(2)(q37),del(7)(q21),-20[15] | 2                                                           | 8                                              | Normocellular   | Yes                    |
| 14         | 75          | Male   | EB 2             | 7 (very high)      | 8,6       | 1,90             | 0,50                     | 58                     | 47,XY,+8[23]/46,XY[2]                                                   | 3                                                           | 15                                             | Hypercellular   | Yes                    |
| 15         | 81          | Male   | MLD              | 3(low)             | 8,0       | 1,78             | 0,50                     | 145                    | 47,XY,+8[23]/46,XY[2]                                                   | 0                                                           | 0                                              | Hypercellular   | No                     |
| 16         | 81          | Male   | MLD              | 2(low)             | 8,9       | 2,11             | 1,0                      | 120                    | 46,XY, del(20)(q11.2)[30]                                               | 0                                                           | 1                                              | Hypercellular   | No                     |

**Supplementary Table 1.** MDS Patients characteristics.

IPSS-R: Revised International Prognostic Scoring System, Hb: hemoglobin, WBC: white blood cells, BM: bone marrow, MLD: multilineage dysplasia, SLD: single lineage dysplasia, EB: excess blasts

<sup>†</sup> assessed by morphology in peripheral blood smears,<sup>††</sup> assessed by morphology of bone marrow smears, \*assessed in bone marrow biopsy

| Gene         | Primer  | Sequence of primers              | RT-PCR conditions                   |
|--------------|---------|----------------------------------|-------------------------------------|
| <i>DDIT4</i> | Forward | 5' -GAGGAAGACACGGCTTAC 3'        | Annealing/Elongation<br>52oC 40 min |
|              | Reverse | 5' -GCATCAGGTTGGCACAC 3'         |                                     |
| <i>HIF1A</i> | Forward | 5' -CAGGACACAGATTTAGACTTGGAGA 3' | Annealing/Elongation<br>52oC 40 min |
|              | Reverse | 5' -AGTGGTAGTGGTGGCATTAGC 3'     |                                     |
| <i>GAPDH</i> | Forward | 5' -GGGAAGCTTGTCATCAATGG 3'      | Annealing/Elongation<br>52oC 40 min |
|              | Reverse | 5' -CATCGCCCCACTTGATTTTG 3'      |                                     |

**Supplementary Table 2.** Primer sequences for qRT PCR

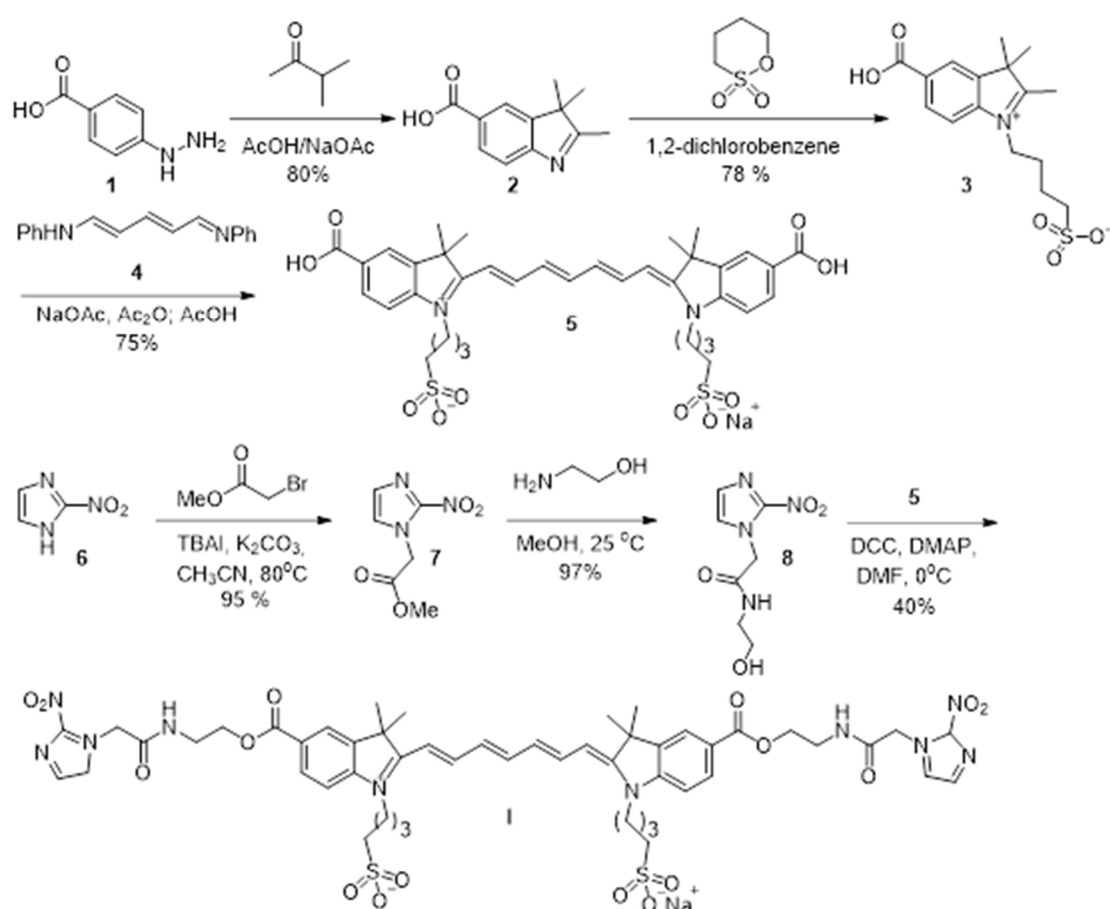

**Supplementary Table 3.** Synthesis of NIM dye-conjugate - developed by Pavlik et al.[1] Modifications mainly concerned workup or purification methods of the intermediates (Supplementary Table 3). In particular, in the synthesis of 2,3,3-trimethyl-3H-indole-5-carboxylic acid 2, the resulted residue was participated between CH<sub>2</sub>Cl<sub>2</sub> and H<sub>2</sub>O, the two phases were separated, the aqueous phase was washed with CH<sub>2</sub>Cl<sub>2</sub> and the combined organic phases were dried over Na<sub>2</sub>SO<sub>4</sub> and evaporated in vacuo. Purification of the residue was performed by flash column chromatography (SiO<sub>2</sub>, CHCl<sub>3</sub>/CH<sub>3</sub>OH 95:5) and 2 was obtained as a bright orange solid. With the use of purified 2 in the synthesis of 5-carboxy-1-(d-sulfobutyl)-2,3,3-trimethyl-3H-indolium betaine 3, the reaction was completed in 5 h of reflux and 3 was afforded as an orange solid (Supplemental Table 3). Methyl 2-(2-nitro-1H-imidazol-1-yl)acetate 7 was purified by a short pad flash column chromatography (SiO<sub>2</sub>, CHCl<sub>3</sub>/MeOH 95:5 to 9:1) and it was afforded as a white solid .

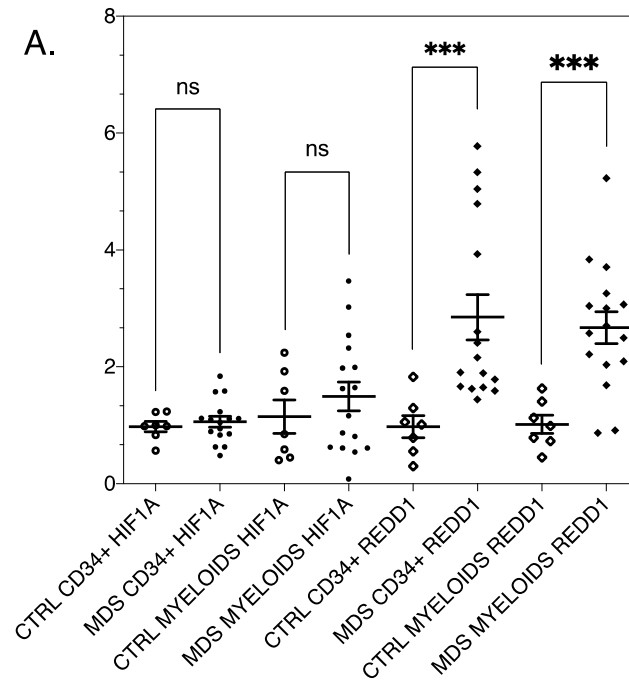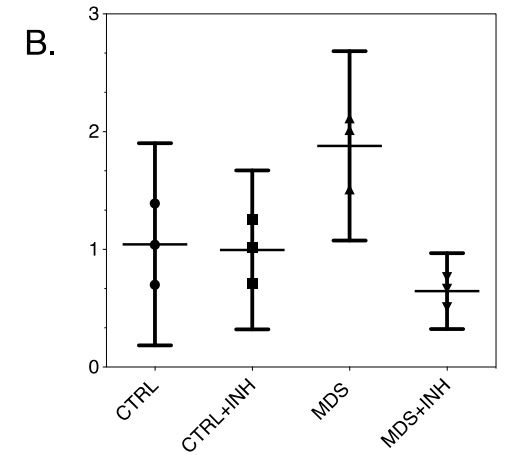

| CTRL      | CTRL+INH  | MDS      | MDS+INH   |
|-----------|-----------|----------|-----------|
| 1,038859  | 1,257013  | 2,114036 | 0,6649025 |
| 1,389918  | 1,01748   | 1,510473 | 0,5077861 |
| 0,6997929 | 0,7144971 | 2,014036 | 0,7649025 |

**Supplementary Figure 1:** (A) HIF1A and REDD1 mRNA expression in CD34+ and myeloid cells of MDS patients (n=16) and controls (n=7). ns: non-significant, sig.: significant. Mann-Whitney Pvalue>0.05 or <0.05 accordingly. (B) REDD1 mRNA expression in in vitro cultures of CD34+ cells after 16 days of differentiation. Data from three independent experiments presented as along with mean±SD. Table shows graph displayed numbers

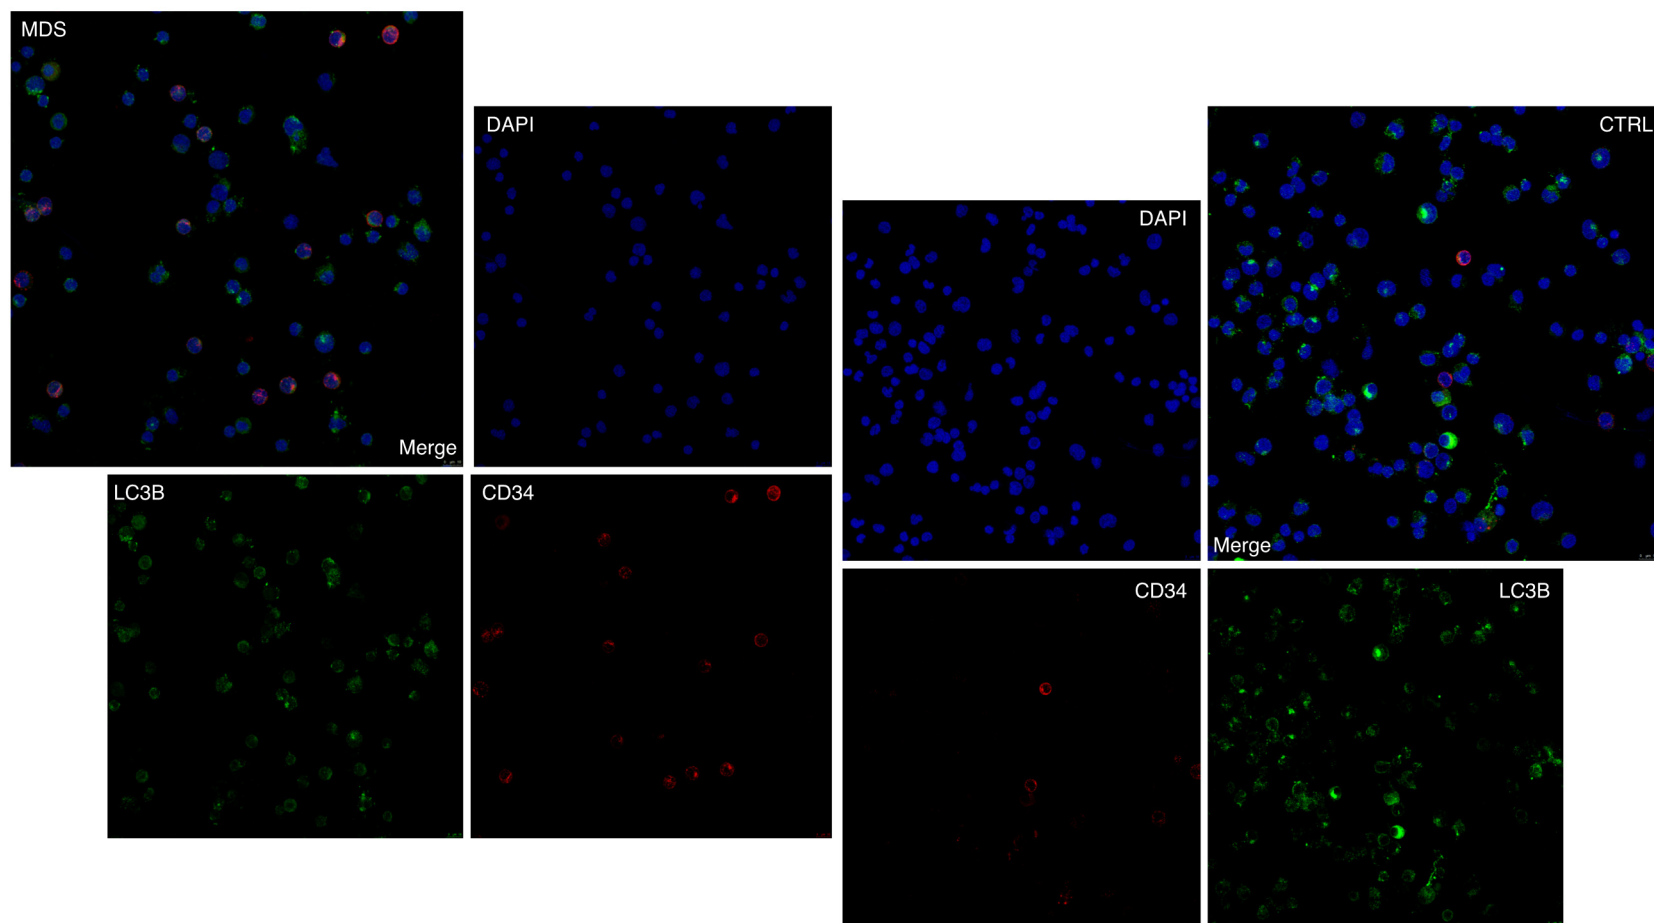

**Supplementary Figure 2:** Immunofluorescence for CD34 and LC3B in one control (CTRL-A) and one MDS (B) sample. Red: MPO, Green: LC3B, Blue: DAPI. Objective 63x/1.4NA. One out of four independent experiments. Cells shown represent the mononuclear-low density layer following bone marrow aspirate ficoll bilayer isolation. Aside from CD34+ percentage no differences are observed in LC3b immunofluorescence. Patient belonged to the high risk group, >5% intra bone marrow blasts as also evident from CD34 immunofluorescence. LC3B: Microtubule-associated proteins 1A/1B light chain 3B.

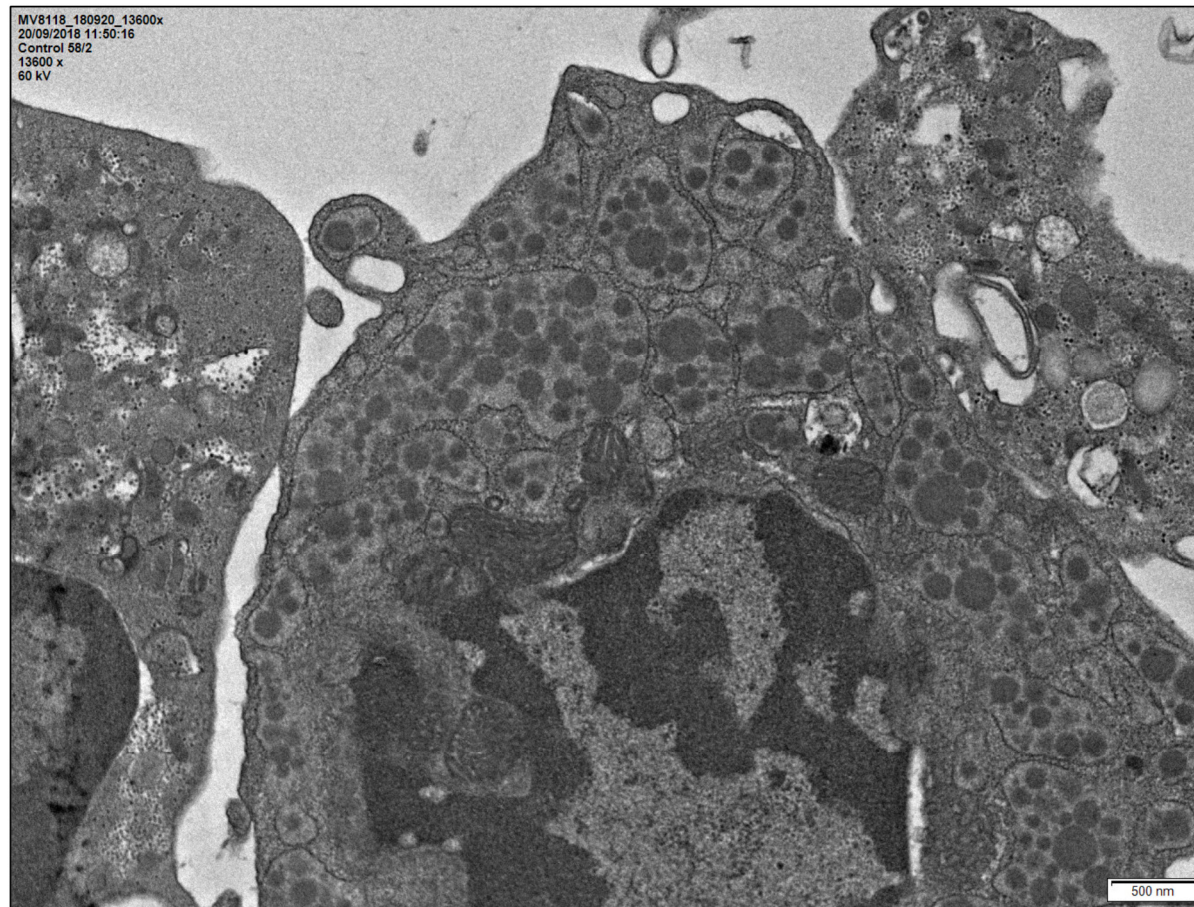

**Supplementary Figure 3:** Electron microscopy of normal differentiating myeloid lineage (control sample) at the myelocyte-metamyelocyte stage. Normal mitochondria with physiologic round appearance and functional cristae. Scale bars and magnifications are shown on the upper left corner of each picture.

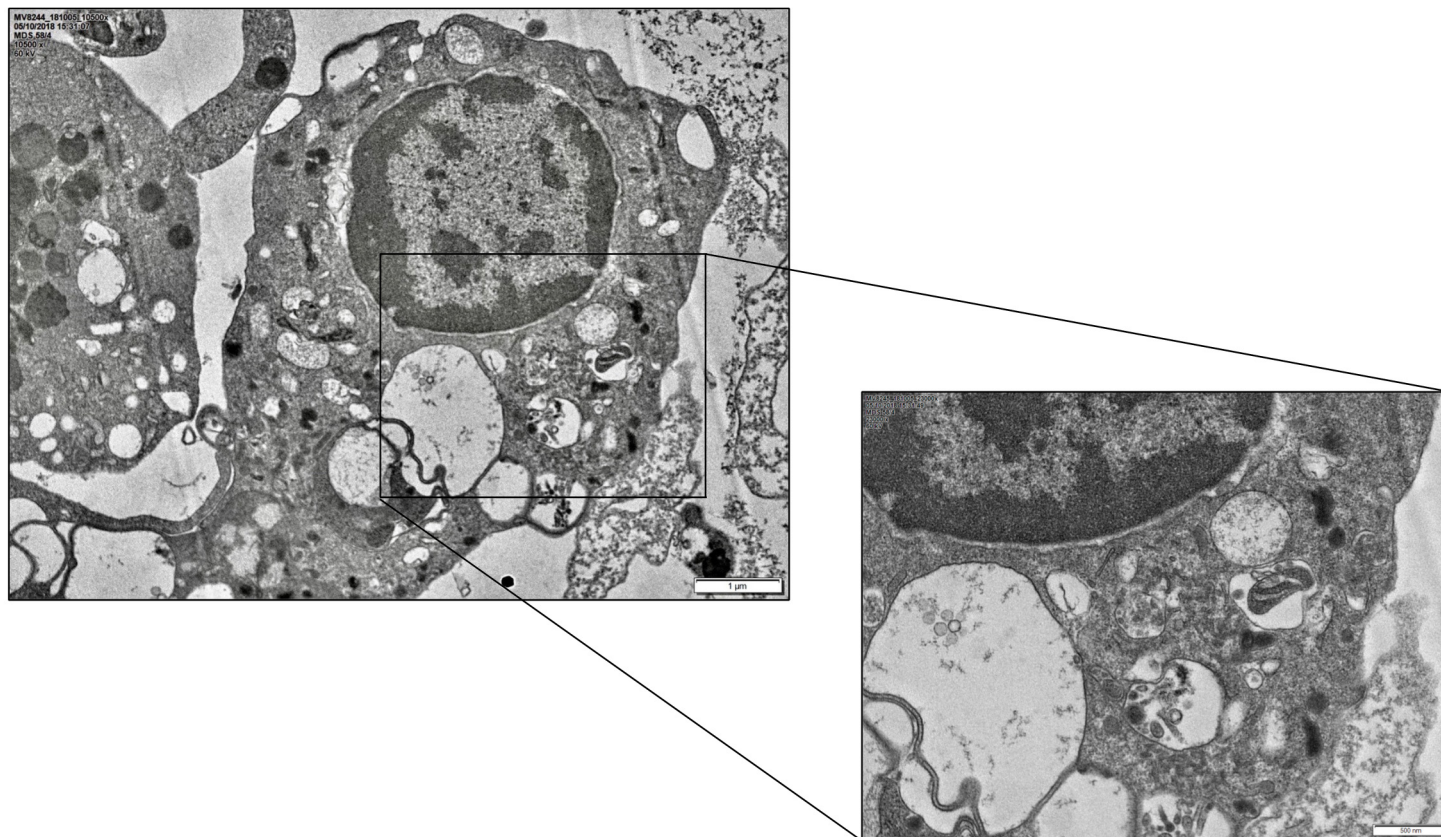

**Supplementary Figure 4:** Electron microscopy of mature MDS myeloid lineage showing marked autophagy, mitophagy and eventual autophagic cell death (autosis) with cytoplasmic abundance of autophagosomes and perinuclear membrane convolution. Large elongated abnormal mitochondria are also evident. One of six independent experiments. Scale bars and magnifications are shown on the upper left corner of each picture. Note patients showing autosis are almost exclusively of the high risk MDS subgroup, namely with >5% intra bone marrow blasts.



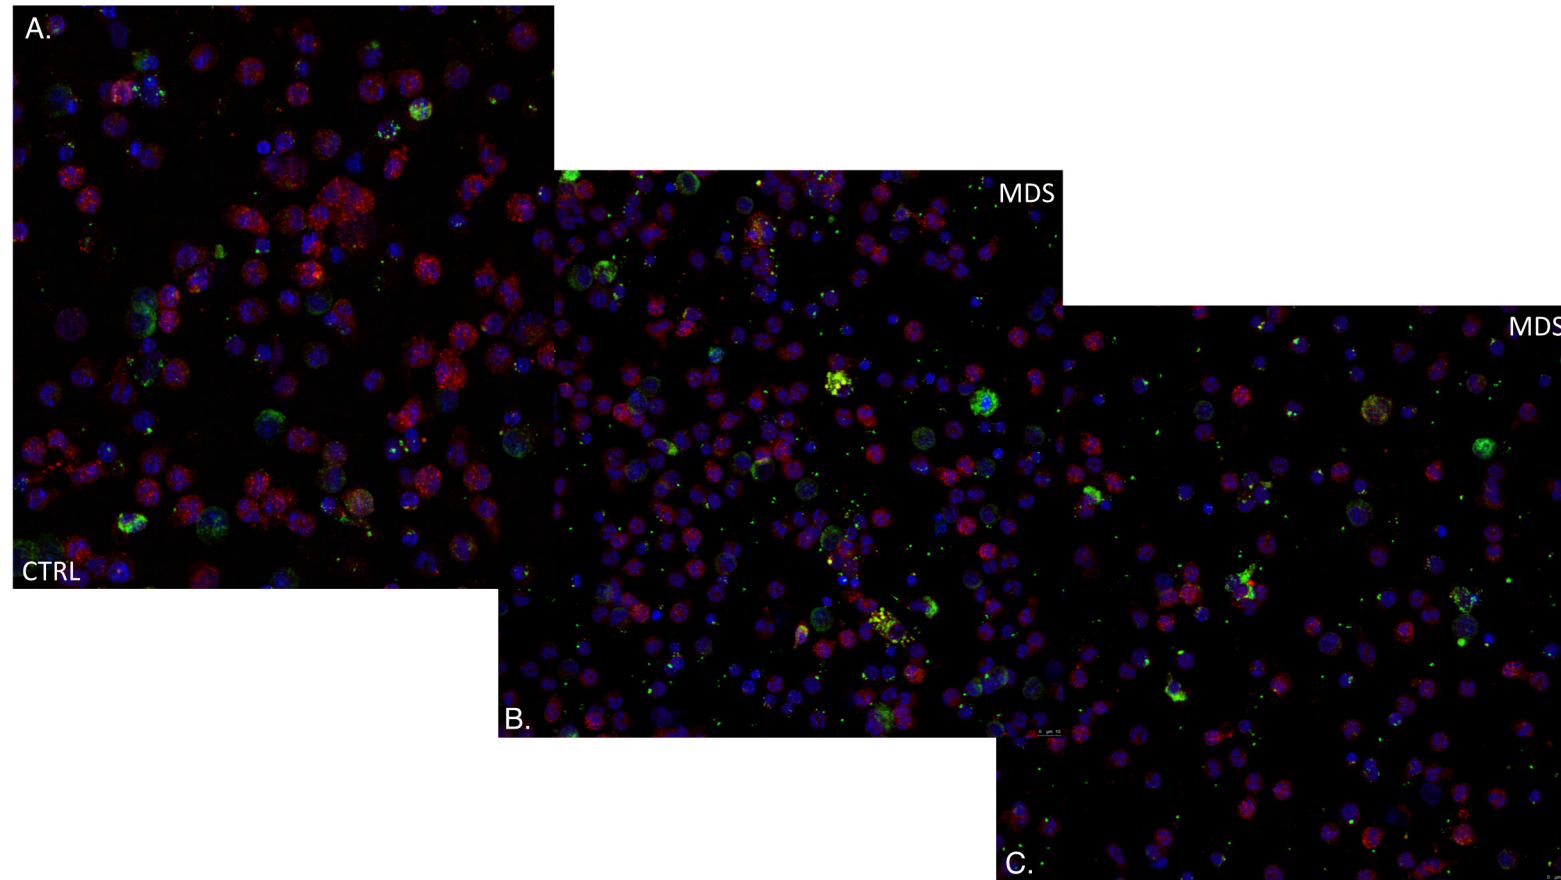

**Supplementary Figure 5:** Immunofluorescence of LC3B and LAMP-1 in myeloid cells of control (CTRL-A) and MDS (B and C) patients. Objective 63x/1.4NA. Red: LAMP1, Green: LC3B, Blue: DAPI. LC3B: Microtubule-associated proteins 1A/1B light chain 3B, LAMP-1: Lysosomal-associated membrane protein 1. Only the merged files are shown.



## References

1. Pavlik C, Biswal NC, Gaenzler FC, Morton MD, Kuhn LT, Claffey KP, et al. Synthesis and fluorescent characteristics of imidazole–indocyanine green conjugates. *Dyes and Pigments*. 2011 2011/04/01/;89(1):9-15.
